# Supplementary material for: Synthetic routes to pyrrolizine-1,5-dione derivatives by flash vacuum pyrolysis of amidomethylene derivatives of Meldrum's acid
Source: Royal Society of Chemistry journal article supplement (doi:10.1039/b911951e), 2009-01-01
Supplement: b911951e.pdf [file b911951e.pdf]

**Electronic Supplementary Information:** McNab, Morrow, Parsons, Shannon and Withell

## **Synthetic routes to pyrrolizine-1,5-dione derivatives by flash vacuum pyrolysis of amidomethylene derivatives of Meldrum's acid**

**Hamish McNab,\* Mark Morrow, Simon Parsons, David A. Shannon and Kirsti Withell**

*School of Chemistry, The University of Edinburgh, West Mains Road, Edinburgh UK  
EH9 3JJ*

[H.McNab@ed.ac.uk](mailto:H.McNab@ed.ac.uk)

### **Supplementary Information**

|                                                                |         |
|----------------------------------------------------------------|---------|
| Products <b>14-18</b> formed by Method A (Main Paper)          | page S2 |
| Products <b>23-27</b> formed by Method B (Main Paper)          | page S3 |
| FVP reactions of <b>8</b> and <b>15-18</b>                     | page S4 |
| Formation of 1,3-dimethyluracil <b>B</b> from <b>16</b>        | page S5 |
| Identification of products from FVP of <b>15</b> and <b>18</b> | page S5 |
| Crystallographic data                                          | page S7 |
| References                                                     | page S8 |

The following products were made using Method A, described in the main paper:

**2,2-Dimethyl-5-[*N*-(2-oxopiperidin-1-yl)methylene]-1,3-dioxane-4,6-dione 14**

(piperidin-2-one, 8 h), (59%), mp 143-144 °C (from hexane/toluene), (Found: C, 56.7; H, 6.05; N, 5.45. C<sub>12</sub>H<sub>15</sub>NO<sub>5</sub> requires C, 56.9; H, 5.95; N, 5.55%); δ<sub>H</sub> 9.00 (1H, s), 3.78 (2H, t, <sup>3</sup>J 5.8), 2.68 (2H, t, <sup>3</sup>J 6.7), 1.96-1.86 (4H, m) and 1.70 (6H, s); δ<sub>C</sub> 170.52 (quat), 163.59 (quat), 159.07 (quat), 152.59, 103.80 (quat), 96.28 (quat), 51.87, 32.76, 26.86, 22.69 and 19.76; *m/z* 195 [(M-C<sub>3</sub>H<sub>6</sub>O)<sup>+</sup>, 93%], 167 (43), 151 (26), 139 (71), 127 (34), 123 (47), 109 (31), 95 (71), 94 (60), 82 (32) and 67 (100).

**2,2-Dimethyl-5-[*N*-(1-oxo-3,4-dihydroisoquinolin-2-yl)methylene]-1,3-dioxane-4,6-dione 15**

[3,4-dihydroisoquinolin-1(2*H*)-one, 18 h], (64%), mp 186-187 °C (from toluene), (Found: C, 63.65; H, 5.05; N, 4.5. C<sub>16</sub>H<sub>15</sub>NO<sub>5</sub> requires C, 63.8; H, 5.0; N, 4.65%); δ<sub>H</sub> 9.24 (1H, s), 8.09 (1H, m), 7.59-7.25 (3H, m), 4.14 (2H, t, <sup>3</sup>J 6.0), 3.10 (2H, t, <sup>3</sup>J 6.0), and 1.75 (6H, s); δ<sub>C</sub> 163.60 (quat), 163.25 (quat), 159.39 (quat), 153.41, 139.61 (quat), 134.33, 130.10, 127.73, 127.35, 126.41 (quat), 103.89 (quat), 95.88 (quat), 50.27, 27.94 and 27.09; *m/z* 243 [(M-C<sub>3</sub>H<sub>6</sub>O)<sup>+</sup>, 100%], 214 (81), 199 (42), 198 (25), 171 (38), 170 (56), 132 (37) and 118 (30).

Reactions with 6-methylpiperidin-2-one and 6-phenylpiperidin-2-one under these sets of conditions failed to give any identifiable products other than unreacted starting material and 5-hydroxymethylene Meldrum's acid.

**2,2-Dimethyl-5-(*N*-methyl-*N*-methylcarbamoylaminomethylene)-1,3-dioxane-4,6-dione 16**

(*N,N'*-dimethylurea, 7 h), (48%), mp 158-159 °C (from toluene/ethyl acetate), (Found: C, 49.5; H, 5.85; N, 11.3. C<sub>10</sub>H<sub>14</sub>N<sub>2</sub>O<sub>5</sub> requires C, 49.6; H, 5.85; N, 11.55%); δ<sub>H</sub> 8.84 (1H, s), 6.65 (1H, br), 3.39 (3H, s), 2.92 (3H, d, <sup>3</sup>J 4.8) and 1.71 (6H, s); δ<sub>C</sub> 164.63 (quat), 159.71 (quat), 155.65, 154.83 (quat), 103.85 (quat), 91.47 (quat), 38.20, 28.24 and 26.80; *m/z* 185 [(M-C<sub>3</sub>H<sub>5</sub>O)<sup>+</sup>, 38%], 140 (10), 128 (31), 127 (33), 99 (38), 84 (25), 83 (100), 82 (31).

**2,2-Dimethyl-5-(*N,N,N'*-trimethylcarbamoylaminomethylene)-1,3-dioxane-4,6-dione 17**

(*N,N,N'*-trimethylurea,<sup>1,2</sup> 6 h), (10%), bp 70 °C (0.6 Torr), (Found: M<sup>+</sup>, 256.1054. C<sub>11</sub>H<sub>16</sub>N<sub>2</sub>O<sub>5</sub> requires *M*, 256.1059); δ<sub>H</sub> 8.07 (1H, br), 3.38 (3H, s), 2.94 (6H, s) and 1.66 (6H, s); δ<sub>C</sub> (measured at -60 °C due to the broadness of the room temperature spectrum) 164.82 (quat), 161.17 (quat), 156.85, 156.09 (quat), 103.99 (quat), 90.01 (quat), 44.16, 38.36, 36.23, 26.94 and 25.99; *m/z* 256 (M<sup>+</sup>, 46%), 212 (38), 199 (41), 198 (66), 180 (20), 154 (38), 142 (27), 141 (30), 126 (56), 97 (43) and 72 (100).

**2,2-Dimethyl-5-[*N*-(2-oxoimidazolidin-1-yl)methylene]-1,3-dioxane-4,6-dione 18**

(imidazolidin-2-one, 7 h), (58%), mp 192-193 °C (dec.) (from ethanol/ acetonitrile), (Found: C, 49.75; H, 5.35; N, 11.4. C<sub>10</sub>H<sub>12</sub>N<sub>2</sub>O<sub>5</sub> requires C, 50.0; H, 5.05; N, 11.65%); δ<sub>H</sub> ([<sup>2</sup>H<sub>6</sub>]DMSO) 8.58 (1H, br), 8.47 (1H, s), 4.12 (2H, t, <sup>3</sup>J 7.5), 3.45 (2H, t, <sup>3</sup>J 7.5) and

1.66 (6H, s);  $\delta_{\text{C}}$  ( $[\text{}^2\text{H}_6\text{]DMSO}$ ) 164.45 (quat), 159.49 (quat), 155.27 (quat), 148.78, 103.62 (quat), 89.87 (quat), 45.68, 37.26 and 26.48;  $m/z$  240 ( $\text{M}^+$ , 8%), 183 (29), 182 (100), 139 (37), 138 (23), 110 (53), 82 (29), 70 (22) and 67 (34).

The following products were made using Method B, described in the main paper:

**Methyl 3-[*N*-(2-oxopiperidin-1-yl)]prop-2-enoate 23<sup>3</sup>**

(piperidin-2-one, 54 h, chromatography), (50%), mp 91-93 °C (from hexane/toluene), (Found: C, 58.7; H, 7.4; N, 7.35.  $\text{C}_9\text{H}_{13}\text{NO}_3$  requires C, 59.0; H, 7.15; N, 7.65%);  $\delta_{\text{H}}$  8.55 (1H, d,  $^3J$  14.5), 5.21 (1H, d,  $^3J$  14.5), 3.67 (3H, s), 3.38 (2H, t,  $^3J$  6.3), 2.50 (2H, t,  $^3J$  6.3) and 1.94-1.76 (4H, m);  $\delta_{\text{C}}$  169.12 (quat), 167.64 (quat), 140.68, 99.18, 52.12, 45.39, 32.90, 22.09 and 19.98;  $m/z$  183 ( $\text{M}^+$ , 4%), 152 (16), 124 (100), 96 (11), 95 (11), 82 (23) and 55 (12).

**Methyl 3-[*N*-(3,4-dihydro-1-oxoisoquinolin-2-yl)]prop-2-enoate 24**

(3,4-dihydroisoquinolin-1(2*H*)-one, 120 h, chromatography), (26%), mp 140-141 °C (from hexane/toluene), (Found: C, 67.8; H, 6.05; N, 6.0.  $\text{C}_{13}\text{H}_{13}\text{NO}_3$  requires C, 67.5; H, 5.65; N, 6.05%);  $\delta_{\text{H}}$  8.66 (1H, d,  $^3J$  14.5), 8.05 (1H, m), 7.45 (1H, m), 7.32 (1H, m), 7.20 (1H, m), 5.36 (1H, d,  $^3J$  14.5), 3.70 (3H, s), 3.73 (2H, t,  $^3J$  6.6) and 3.06 (2H, t,  $^3J$  6.6);  $\delta_{\text{C}}$  167.71 (quat), 162.50 (quat), 140.82, 138.05 (quat), 132.93, 129.08, 127.66 (quat), 127.25, 127.00, 99.35, 51.16, 42.88 and 26.78;  $m/z$  231 ( $\text{M}^+$ , 14%), 200 (46), 173 (37), 172 (100), 130 (13), 118 (12), 91 (11), 90 (22) and 89 (13).

**Methyl 3-(*N*-methyl-*N*-carbamoylamino)prop-2-enoate 25** (*N,N'*-dimethylurea, 96 h, recrystallisation), (48%), mp 114-115 °C (from hexane/ethyl acetate), (Found: C, 48.6; H, 7.1; N, 16.4.  $\text{C}_7\text{H}_{12}\text{N}_2\text{O}_3$  requires C, 48.85; H, 7.05; N, 16.25%);  $\delta_{\text{H}}$  8.21 (1H, d,  $^3J$  13.7), 5.85 (1H, br), 5.06 (1H, d,  $^3J$  13.7), 3.68 (3H, s), 3.06 (3H, s) and 2.85 (3H, d,  $^3J$  4.4);  $\delta_{\text{C}}$  168.52 (quat), 155.44 (quat), 143.21, 95.17, 51.10, 31.11 and 27.80;  $m/z$  172 ( $\text{M}^+$ , 3%), 141 (9), 115 (62), 84 (100), 83 (19), 82 (15) and 58 (27).

**Methyl 3-(*N,N,N'*-trimethylcarbamoyl-*N*-methylamino)prop-2-enoate 26** (*N,N,N'*-trimethylurea,<sup>1,2</sup> 16 h, chromatography), (8%), bp 65 °C (0.2 Torr), (Found:  $\text{M}^+$ , 186.1009.  $\text{C}_8\text{H}_{14}\text{N}_2\text{O}_3$  requires *M*, 186.1004);  $\delta_{\text{H}}$  7.72 (1H, d,  $^3J$  13.6), 4.99 (1H, d,  $^3J$  13.6), 3.65 (3H, s), 2.96 (3H, s) and 2.87 (6H, s);  $\delta_{\text{C}}$  168.29 (quat), 160.52 (quat), 146.36, 94.13, 51.04, 38.53, 36.22 and 33.44;  $m/z$  186 ( $\text{M}^+$ , 52%), 155 (46), 132 (27), 127 (50), 113 (54), 112 (51), 102 (43), 86 (74), 84 (87), 82 (40) and 72 (100).

**Methyl 3-[*N*-(2-oxoimidazolidin-1-yl)]prop-2-enoate 27**

(imidazolidin-2-one, 192 h, recrystallisation), (58%), mp 147-148 °C (from hexane/ethyl acetate), (Found: C, 49.45; H, 6.0; N, 16.75.  $\text{C}_7\text{H}_{10}\text{N}_2\text{O}_3$  requires C, 49.4; H, 5.9; N, 16.45%);  $\delta_{\text{H}}$  8.01 (1H, d,  $^3J$  14.3), 6.5 (1H, br), 4.94 (1H, d,  $^3J$  14.3), 3.68 (3H, s) and 3.66-3.60 (4H, m);  $\delta_{\text{C}}$  167.85 (quat), 157.35 (quat), 138.86, 95.45, 51.04, 41.79 and 37.32;  $m/z$  170 ( $\text{M}^+$ , 49%), 139 (81), 138 (100), 111 (27), 96 (24), 95 (66), 82 (88), 70 (28), 69 (25) and 68 (43).

## FVP Reactions

General conditions are described in the main paper.

### FVP of 2,2-dimethyl-5-(*N*-formyl-*N*-methylaminomethylene)-1,3-dioxane-4,6-dione **8**

[0.19 g (0.89 mmol),  $T_f$  600 °C,  $T_i$  180 °C, P 0.01 Torr, t 15 min] Examination of the pyrolysate by  $^1\text{H}$  NMR spectroscopy showed no identifiable products. Repeat pyrolyses at higher and lower furnace temperatures (500-800 °C) gave the same result.

### FVP of 2,2-Dimethyl-5-[*N*-(1-oxo-3,4-dihydroisoquinolinyl)methylene]-1,3-dioxane-4,6-dione **15**

Initial small scale pyrolyses carried out over a range of furnace temperatures (500-750 °C) showed little consistency when pyrolysates were examined by  $^1\text{H}$  NMR spectroscopy. The most promising temperature was therefore selected and the pyrolysis scaled-up [2.72 g (9.0 mmol),  $T_f$  700 °C,  $T_i$  210 °C, P 0.02 Torr, t 120 min]. Dry flash chromatography of the soluble portion of the pyrolysate (using *n*-hexane and ethyl acetate as eluents) gave one identifiable product which was assigned as 2-ethenylisoquinolin-1(2*H*)-one<sup>4</sup> **A** (see discussion below), (0.031 g, 2%), bp 80-85 °C (0.5 Torr);  $\delta_{\text{H}}$  (360 MHz) 8.41 (1H, m), 7.70 (1H, dd,  $^3J$  9.2 and 16.1), 7.62 (1H, m), 7.46 (2H, m), 7.33 (1H, d,  $^3J$  7.6), 6.52 (1H, d,  $^3J$  7.6), 5.20 (1H, dd,  $^2J$  1.7 and  $^3J$  16.1) and 4.97 (1H, dd,  $^2J$  1.7,  $^3J$  9.2);  $\delta_{\text{C}}$  (90 MHz) 160.67 (quat), 136.31 (quat), 132.64, 131.67, 128.23, 127.19, 126.10 (quat), 125.99, 125.90, 107.11 and 101.19 (consistent with literature data<sup>4</sup>)  $m/z$  171 ( $M^+$ , 74%), 170 (91), 169 (52), 147 (37), 146 (38), 145 (51), 130 (36), 129 (32), 128 (47), 119 (47), 118 (57), 117 (49), 116 (51), 115 (54), 102 (41) and 86 (100).

### FVP of 2,2-dimethyl-5-(*N*-methyl-*N*-methylcarbamoylaminomethylene)-1,3-dioxane-4,6-dione **16**

[0.30 g (1.2 mmol),  $T_f$  700 °C,  $T_i$  190 °C, P 0.02 Torr, t 55 min] The pyrolysate was removed from the trap with acetone from which a dark brown solid slowly precipitated. This was collected by filtration and shown to be *N,N'*-dimethyluracil **B** (see discussion below) (0.02 g, 11%), mp 122-123 °C (from ethanol) (lit.,<sup>5</sup> 123-124 °C);  $\delta_{\text{H}}$  ( $^2\text{H}_6$ ]DMSO) 7.72 (1H, d,  $^3J$  7.9), 5.72 (1H, d,  $^3J$  7.9), 3.35 (3H, s) and 3.21 (3H, s).

### F V P o f 2, 2-Dimethyl-5-(*N*-methyl-*N*-dimethylcarbamoylaminomethylene)-1,3-dioxane-4,6-dione **17**

[0.10 g (0.39 mmol),  $T_f$  700 °C,  $T_i$  150 °C, P 0.01 Torr, t 28 min] The pyrolysis produced mainly insoluble brown polymer.

### FVP of 2,2-Dimethyl-5-[*N*-(2-oxoimidazolidinyl)methylene]-1,3-dioxane-4,6-dione **18**

Pyrolysis of this compound [0.1 g (0.42 mmol),  $T_f$  700 °C,  $T_i$  240 °C, P 0.02 Torr, t 27 min] proved difficult due to its poor volatility. On a 0.1 g scale, a 40% residue remained in the inlet tube, and mainly insoluble polymeric material in the trap. Examination of the minor soluble portion of the pyrolysate by  $^1\text{H}$  NMR spectroscopy showed it to be 1-ethenyl-1,3-dihydroimidazol-2(2*H*)-one<sup>6,7</sup> **C** (see discussion below), (4%), bp 100 °C (0.3 Torr), (Found:  $M^+$ , 110.0482.  $\text{C}_5\text{H}_6\text{N}_2\text{O}$  requires  $M$ , 110.0480);  $\delta_{\text{H}}$  6.90 (1H, dd,  $^3J$  16.1 and 9.2), 6.48 (1H, m), 6.33 (1H, m), 4.89 (1H, dd,  $^3J$  16.1 and  $^2J$  1.1) and 4.65 (1H, dd,

$^3J_{9.2}$  and  $^2J_{1.1}$ );  $\delta_C$  ( $[^2H_6]$ DMSO) 164.32 (quat), 127.33, 110.56, 107.15 and 95.62;  $m/z$  110 ( $M^+$ , 83%), 86 (93), 85 (16), 81 (60), 73 (16), 68 (34) and 54 (100).

### Formation of 1,3-dimethyluracil **B** from **16**

Rather than undergo a 1,4-hydrogen shift from the methyl group attached to the aminomethylene position (*c.f.* Scheme 1 of the main paper), the methyleneketene derived from **16** appears to undergo an inefficient hydrogen transfer from the free NH to provide a dipolar species which collapses to 1,3-dimethyluracil **B** (11%).

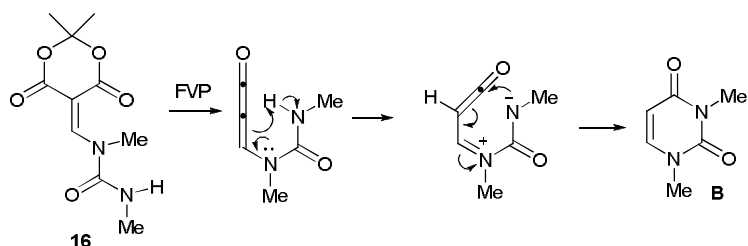

### Identification of products from FVP of **15** and **18**

The isoquinoline derivative, **15** was subjected to FVP over a range of temperatures (500-800 °C) but gave highly complex mixtures of products; the temperature giving the least complex mixture (700 °C) was pyrolysed on a larger scale and the products were subjected to dry flash chromatography. Only one product was isolated from the column (2%). The  $^{13}C$  NMR spectrum indicated the compound contained 11 carbon atoms, comprised of 3 quaternary carbon atoms, 7 CH carbon atoms and 1  $CH_2$  carbon atom. The  $^1H$  NMR spectrum showed doublets of doublets at 4.97, 5.20 and 7.70 p.p.m. corresponding to an ethenyl group, with coupling constants of 1.7, 9.2 and 16.1 Hz. Mass spectrometry indicated a molecular ion of  $m/z$  171 ( $C_{11}H_9NO$ ), and the breakdown pattern confirmed the presence of the ethenyl group with a peak at  $(M-27)^+$ . Combining all the information led to the assignment of the structure as **A**; the complete NMR assignments for the proton and carbon atoms (which were confirmed by an HSQC experiment); and significant NOE enhancements are shown below.

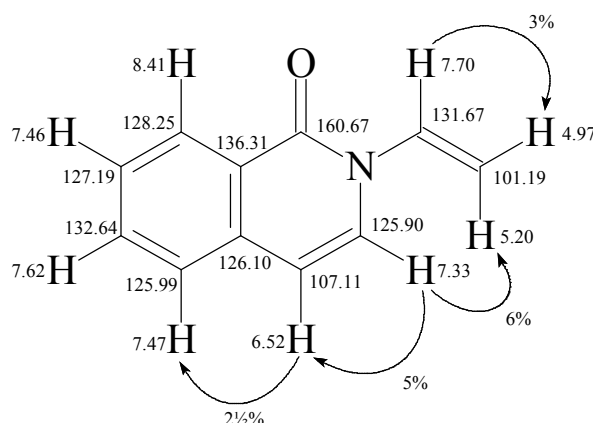

Compound **A** may be formed by vicinal hydrogen atom abstraction<sup>8</sup> from a methylenecarbene intermediate:

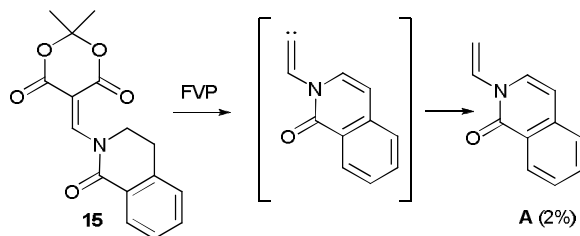

An identical type of reaction was observed when the Meldrum's acid derivative **18** was pyrolysed:

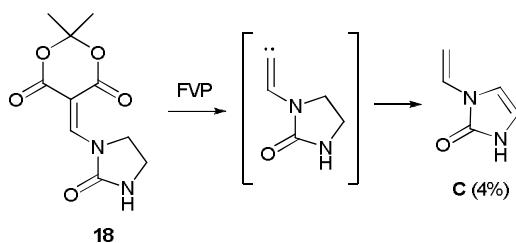

The *N*-ethenylimidazolidinone **C** was isolated from the pyrolysis, but in a yield of only 4%.

**Table 1. Crystallographic experimental data<sup>9</sup>**

|                                                       | <b>10</b>                                                                        | <b>12</b>                                                                        | <b>19</b>                                                                        | <b>32</b>                                                                        | <b>34</b>                                                                        |
|-------------------------------------------------------|----------------------------------------------------------------------------------|----------------------------------------------------------------------------------|----------------------------------------------------------------------------------|----------------------------------------------------------------------------------|----------------------------------------------------------------------------------|
| CSD REFCODE                                           | <b>OCAVAQ</b>                                                                    | <b>OCARUG</b>                                                                    | <b>OCAVEU</b>                                                                    | <b>OCASOB</b>                                                                    | <b>OCAREQ</b>                                                                    |
| Crystal data                                          |                                                                                  |                                                                                  |                                                                                  |                                                                                  |                                                                                  |
| Chemical formula                                      | C <sub>12</sub> H <sub>15</sub> NO <sub>5</sub>                                  | C <sub>21</sub> H <sub>17</sub> NO <sub>5</sub>                                  | C <sub>8</sub> H <sub>11</sub> NO <sub>3</sub>                                   | C <sub>8</sub> H <sub>9</sub> NO <sub>2</sub>                                    | C <sub>17</sub> H <sub>11</sub> NO <sub>2</sub>                                  |
| <i>M<sub>r</sub></i>                                  | 253.25                                                                           | 363.36                                                                           | 169.18                                                                           | 151.16                                                                           | 261.27                                                                           |
| Cell setting, space group                             | Monoclinic, <i>P2(1)/c</i>                                                       | Monoclinic, <i>P2(1)/c</i>                                                       | Monoclinic, <i>P2(1)/n</i>                                                       | Monoclinic, <i>P2(1)/n</i>                                                       | Monoclinic, <i>P2<sub>1</sub>/c</i>                                              |
| Temperature (K)                                       | 150 (2)                                                                          | 220 (2)                                                                          | 293 (2)                                                                          | 293 (2)                                                                          | 220 (2)                                                                          |
| <i>a, b, c</i> (Å)                                    | 7.5098 (10),<br>17.549 (2),<br>9.2149 (10)                                       | 17.452 (2),<br>6.9642 (10),<br>16.402 (2)                                        | 7.8763 (8),<br>11.8734 (9),<br>9.4875 (7)                                        | 9.8974 (8),<br>7.1505 (5),<br>11.2656 (8)                                        | 12.370 (3),<br>8.3166 (14),<br>12.570 (2)                                        |
| β (°)                                                 | 100.521 (7)                                                                      | 116.631 (9)                                                                      | 106.367 (6)                                                                      | 111.738 (6)                                                                      | 104.60 (2)                                                                       |
| <i>V</i> (Å <sup>3</sup> )                            | 1194.0 (2)                                                                       | 1782.0 (4)                                                                       | 851.30 (12)                                                                      | 740.58 (10)                                                                      | 1251.4 (4)                                                                       |
| <i>Z</i>                                              | 4                                                                                | 4                                                                                | 4                                                                                | 4                                                                                | 4                                                                                |
| <i>D<sub>x</sub></i> (Mg m <sup>-3</sup> )            | 1.409                                                                            | 1.354                                                                            | 1.320                                                                            | 1.356                                                                            | 1.387                                                                            |
| Radiation type                                        | Cu <i>K</i> α                                                                    | Cu <i>K</i> α                                                                    | Cu <i>K</i> α                                                                    | Cu <i>K</i> α                                                                    | Mo <i>K</i> α                                                                    |
| μ (mm <sup>-1</sup> )                                 | 0.93                                                                             | 0.81                                                                             | 0.85                                                                             | 0.81                                                                             | 0.09                                                                             |
| Crystal form, colour                                  | Lath, colourless                                                                 | Block, colourless                                                                | Block, colourless                                                                | Irregular block, colourless                                                      | Block, colourless                                                                |
| Crystal size (mm)                                     | 0.47 × 0.23 × 0.16                                                               | 0.47 × 0.39 × 0.31                                                               | 0.23 × 0.12 × 0.08                                                               | 0.39 × 0.31 × 0.27                                                               | 0.35 × 0.23 × 0.12                                                               |
| Data collection                                       |                                                                                  |                                                                                  |                                                                                  |                                                                                  |                                                                                  |
| Diffractionmeter                                      | Stoe Stadi-4 diffractometer with Oxford Cryosystems variable temperature device. | Stoe Stadi-4 diffractometer with Oxford Cryosystems variable temperature device. | Stoe Stadi-4 diffractometer with Oxford Cryosystems variable temperature device. | Stoe Stadi-4 diffractometer with Oxford Cryosystems variable temperature device. | Stoe Stadi-4 diffractometer with Oxford Cryosystems variable temperature device. |
| Data collection method                                | ω–θ                                                                              | ω with learnt profile                                                            | ω–2θ                                                                             | ω–2θ                                                                             | ω–θ                                                                              |
| No. of measured, independent and observed reflections | 2057, 1751, 1540                                                                 | 4131, 2599, 2437                                                                 | 1271, 1240, 721                                                                  | 1572, 1084, 995                                                                  | 3102, 2197, 1194                                                                 |
| Criterion for                                         | <i>I</i> > 2σ( <i>I</i> )                                                        |

|                                                                              |                                                                                             |                                                                                            |                                                                                             |                                                                                             |                                                                                   |
|------------------------------------------------------------------------------|---------------------------------------------------------------------------------------------|--------------------------------------------------------------------------------------------|---------------------------------------------------------------------------------------------|---------------------------------------------------------------------------------------------|-----------------------------------------------------------------------------------|
| observed reflections                                                         |                                                                                             |                                                                                            |                                                                                             |                                                                                             |                                                                                   |
| $R_{\text{int}}$                                                             | 0.008                                                                                       | 0.018                                                                                      | 0.042                                                                                       | 0.045                                                                                       | 0.036                                                                             |
| $\theta_{\text{max}}$ (°)                                                    | 60.0                                                                                        | 59.9                                                                                       | 60.1                                                                                        | 60.0                                                                                        | 25.0                                                                              |
| No. and frequency of standard reflections                                    | 3 every 120 min                                                                             |                                                                                            |                                                                                             |                                                                                             |                                                                                   |
| Intensity decay (%)                                                          | 0                                                                                           | 15                                                                                         | 0                                                                                           | 0                                                                                           | 0                                                                                 |
| Refinement                                                                   |                                                                                             |                                                                                            |                                                                                             |                                                                                             |                                                                                   |
| Refinement on                                                                | $F^2$                                                                                       | $F^2$                                                                                      | $F^2$                                                                                       | $F^2$                                                                                       | $F^2$                                                                             |
| $R[F^2 > 2\sigma(F^2)]$ ,<br>$wR(F^2)$ , $S$                                 | 0.032, 0.083,<br>1.04                                                                       | 0.033, 0.094,<br>1.09                                                                      | 0.051, 0.131,<br>1.02                                                                       | 0.039, 0.113,<br>1.03                                                                       | 0.053, 0.110,<br>0.96                                                             |
| No. of reflections                                                           | 1750 reflections                                                                            | 2594 reflections                                                                           | 1238 reflections                                                                            | 1081 reflections                                                                            | 2195 reflections                                                                  |
| No. of parameters                                                            | 167                                                                                         | 245                                                                                        | 111                                                                                         | 101                                                                                         | 182                                                                               |
| H-atom treatment                                                             | calc                                                                                        | calc                                                                                       | calc                                                                                        | calc                                                                                        | calc                                                                              |
| Weighting scheme                                                             | Calculated $w = 1/[\sigma^2(F_o^2) + (0.0417P)^2 + 0.4363P]$ where $P = (F_o^2 + 2F_c^2)/3$ | Calculated $w = 1/[\sigma^2(F_o^2) + (0.040P)^2 + 0.7272P]$ where $P = (F_o^2 + 2F_c^2)/3$ | Calculated $w = 1/[\sigma^2(F_o^2) + (0.0555P)^2 + 0.1931P]$ where $P = (F_o^2 + 2F_c^2)/3$ | Calculated $w = 1/[\sigma^2(F_o^2) + (0.0611P)^2 + 0.2137P]$ where $P = (F_o^2 + 2F_c^2)/3$ | Calculated $w = 1/[\sigma^2(F_o^2) + (0.0416P)^2]$ where $P = (F_o^2 + 2F_c^2)/3$ |
| $(\Delta/\sigma)_{\text{max}}$                                               | <0.0001                                                                                     | <0.0001                                                                                    | <0.0001                                                                                     | <0.0001                                                                                     | <0.0001                                                                           |
| $\Delta\rho_{\text{max}}$ , $\Delta\rho_{\text{min}}$ (e $\text{\AA}^{-3}$ ) | 0.18, -0.16                                                                                 | 0.19, -0.18                                                                                | 0.18, -0.15                                                                                 | 0.20, -0.14                                                                                 | 0.25, -0.19                                                                       |
| Extinction method                                                            | SHELXL                                                                                      | SHELXL                                                                                     | SHELXL                                                                                      | SHELXL                                                                                      | SHELXL                                                                            |
| Extinction coefficient                                                       | 0.0031 (4)                                                                                  | 0.0054 (3)                                                                                 | 0.0113 (13)                                                                                 | 0.0296 (26)                                                                                 | 0.0127 (16)                                                                       |

## References

1. T. D. J. D'Silva, A. Lopes, R. L. Jones, S. Singhawangcha and J. K. Chan, *J. Org. Chem.*, 1986, **51**, 3781-3788.
2. J. Lukác and H. Heimgartner, *Helv. Chim. Acta*, 1979, **62**, 1236-1251.
3. T. Hosokawa, M. Takano, Y. Kuroki and S.-I. Murahashi, *Tetrahedron Lett.*, 1992, **33**, 6643-6646.
4. A. V. Afonin, A. V. Vashchenko, M. A. Andriyankov, V. K. Voronov, E. I. Enikeeva and L. L. Dmitrieva, *Izv. Akad. Nauk. SSSR, Ser. Khim.*, 1990, 1539-1547.



5. D. Davidson and O. Baudisch, *J. Am. Chem. Soc.*, 1926, **48**, 2379-2383.
6. E. Kato, Jpn. Kokai Tokkyo Koho JP 05019498 (*Chem. Abstr.*, 1994, **120**, P148870a).
7. E. Kato, Jpn. Kokai Tokkyo Koho JP 05127394 (*Chem. Abstr.*, 1994, **121** P191362u).
8. W. D. Crow and H. McNab, *Aust. J. Chem.*, 1979, **32**, 111-121.
9. Crystallographic Computer programs: *Stoe DIF4*; *Stoe REDU4*; *SHELXS-86* (Sheldrick, 1990); *SHELXTL*; *SHELXL-93* (Sheldrick, 1993).
